# Supplementary material for: Pilot Study of An Intracranial Electroencephalography Biomarker of Depressive Symptoms in Epilepsy
Source: Atypon-hosted journal article supplement (doi:10.1176/appi.neuropsych.19030081), 2019-08-09
Supplement: appi.neuropsych.19030081.ds001.pdf [file appi.neuropsych.19030081.ds001.pdf]

|       | pc1      | pc2      | pc3      | pc4      | pc5      | pc6      | pc7      | pc8      | pc9      | pc10     | pc11     | pc12     |
|-------|----------|----------|----------|----------|----------|----------|----------|----------|----------|----------|----------|----------|
| OFC_D | 0.27776  | -0.0235  | 0.252856 | -0.20884 | -0.3413  | -0.09686 | -0.09265 | 0.151194 | 0.058989 | 0.166839 | -0.02876 | -0.15958 |
| OFC_T | 0.007109 | -0.10298 | 0.176546 | 0.549629 | 0.000597 | 0.435648 | 0.504792 | -0.14674 | -0.18192 | 0.038356 | 0.03075  | -0.02329 |
| OFC_A | -0.27608 | 0.256118 | -0.15434 | 0.051274 | 0.169684 | -0.14162 | 0.190771 | -0.26187 | -0.03593 | -0.25334 | -0.01556 | 0.327428 |
| OFC_B | -0.23316 | -0.07204 | -0.34092 | -0.03576 | 0.349149 | -0.00251 | -0.21298 | 0.100664 | 0.247089 | -0.04082 | 0.030412 | -0.14388 |
| OFC_G | -0.06068 | -0.28004 | -0.26668 | 0.151854 | 0.346671 | 0.231741 | -0.31465 | 0.077399 | -0.26562 | 0.09517  | 0.170296 | -0.13219 |
| A_D   | 0.338145 | 0.099676 | -0.17906 | 0.081004 | 0.096615 | -0.30759 | -0.02523 | -0.23255 | -0.19464 | 0.147054 | 0.112289 | 0.102324 |
| A_T   | -0.13124 | 0.291472 | -0.19654 | 0.237825 | -0.17169 | 0.08293  | 0.105315 | 0.766527 | -0.07271 | -0.06089 | -0.08509 | -0.10172 |
| A_A   | -0.34414 | 0.080934 | 0.182275 | -0.16021 | -0.08155 | -0.02393 | 0.257378 | -0.08784 | 0.280034 | -0.07269 | 0.055266 | -0.06463 |
| A_B   | -0.21621 | -0.25458 | 0.282907 | -0.18103 | 0.109703 | 0.152832 | -0.01519 | 0.065024 | -0.06306 | 0.35782  | -0.29196 | -0.04226 |
| A_G   | -0.12715 | -0.35783 | 0.136069 | -0.12083 | -0.0864  | 0.394838 | -0.22784 | -0.04791 | 0.190072 | -0.34103 | -0.01071 | 0.250989 |
| H_D   | 0.370067 | -0.0368  | -0.15616 | -0.02656 | -0.06034 | 0.231561 | 0.026103 | 0.002274 | 0.094471 | -0.05057 | -0.02792 | 0.186327 |
| H_T   | -0.25537 | 0.311246 | 0.069206 | 0.173868 | 0.014357 | -0.04854 | -0.21665 | -0.04503 | 0.184013 | -0.00896 | -0.36376 | 0.120904 |
| H_A   | -0.31675 | 0.202325 | -0.00077 | -0.24587 | 0.032517 | 0.117115 | 0.14659  | -0.10146 | -0.02411 | 0.408689 | 0.488626 | -0.23251 |
| H_B   | -0.25951 | -0.20495 | 0.254537 | 0.090958 | 0.038736 | -0.3337  | -0.08531 | 0.203571 | -0.39189 | 0.230165 | -0.00845 | 0.495794 |
| H_G   | -0.09599 | -0.37634 | 0.12154  | 0.023493 | 0.046782 | -0.42367 | 0.19354  | 0.04972  | -0.16564 | -0.49161 | 0.038929 | -0.43844 |
| C1_D  | 0.198997 | 0.133838 | 0.201311 | -0.23632 | 0.47868  | 0.064432 | 0.222444 | 0.177574 | 0.014408 | -0.07346 | -0.1561  | 0.084815 |
| C1_T  | -0.05299 | 0.114043 | 0.312641 | 0.494028 | -0.1342  | -0.07556 | -0.42354 | -0.14055 | 0.173674 | -0.00147 | 0.210606 | -0.14844 |
| C1_A  | -0.20543 | 0.05501  | -0.29862 | -0.18262 | -0.40452 | 0.140378 | -0.08107 | -0.27591 | -0.47139 | -0.05138 | -0.36964 | -0.16477 |
| C1_B  | -0.10874 | -0.28349 | -0.28652 | -0.03644 | -0.35817 | -0.08553 | 0.167307 | 0.143857 | 0.178635 | 0.020033 | 0.351683 | 0.35945  |
| C1_G  | -0.01156 | -0.32898 | -0.27017 | 0.237405 | 0.002817 | -0.21983 | 0.22011  | -0.10335 | 0.399943 | 0.384801 | -0.39664 | -0.1087  |

**Table S1. Component Loadings.**

Abbreviations: pc = principal component, OFC=orbitofrontal cortex, A=amygdala, H=hippocampus, C1=cingulate, \_D=delta, \_\_T=theta, \_A=alpha, \_B=beta, \_G=gamma power.
